# Supplementary material
Source: PubMed Central journal article supplement (PMC4251453)
Supplement: NIHMS637955-supplement-Supplementary_Data.pdf [file NIHMS637955-supplement-Supplementary_Data.pdf]

**Supplementary figures and tables.**

|                                 | <b>Value</b> | <b>TASQ<br/>ITT (N=134)</b> | <b>Placebo<br/>ITT (N=67)</b> | <b>TASQ<br/>PCWG2 Bone<br/>Mets (N=92)</b> | <b>Placebo<br/>PCWG2 Bone<br/>Mets (N=44)</b> |
|---------------------------------|--------------|-----------------------------|-------------------------------|--------------------------------------------|-----------------------------------------------|
| <b>Age (Years)</b>              | Mean (SD)    | 72.3 (9.6)                  | 73.2 (8.7)                    | 72.6 (9.9)                                 | 75.0 (7.3)                                    |
| <b>Pain (VAS)</b>               | No Pain      | 97 (72%)                    | 59 (89%)                      | 64 (70%)                                   | 37 (84%)                                      |
|                                 | VAS 1-4      | 37 (28%)                    | 7 (11%)                       | 28 (30%)                                   | 7 (16%)                                       |
| <b>Karnofsky Score</b>          | >80%         | 120 (90%)                   | 59 (88%)                      | 82 (89%)                                   | 39 (89%)                                      |
|                                 | <=80%        | 14 (10%)                    | 8 (12%)                       | 10 (11%)                                   | 5 (11%)                                       |
| <b>PSA Level (ug/L)</b>         | Median (SD)  | 29 (36)                     | 19 (20)                       | 27 (32)                                    | 20 (21)                                       |
| <b>Historic PSA DT<br/>(Mo)</b> | Median (SD)  | 4.2 (2.8)                   | 5.1 (3.1)                     | 4.0 (2.9)                                  | 4.4 (3.3)                                     |
| <b>LDH (U/L)</b>                | Median (SD)  | 202 (48)                    | 206 (46)                      | 193 (47)                                   | 214 (55)                                      |
| <b>Alk Phos (U/L)</b>           | Median (SD)  | 98 (41)                     | 87 (35)                       | 102 (43)                                   | 90 (43)                                       |
| <b>Hemoglobin (g/L)</b>         | Median (SD)  | 129 (15)                    | 132 (13)                      | 131 (15)                                   | 132 (14)                                      |
| <b>Visceral disease</b>         | N (%)        | 32 (24)                     | 10 (15)                       | 0                                          | 0                                             |

**SupplementaryTable 1.** Baseline characteristics of patients in the trial and subgroups investigated, including parameters used in the multivariate analysis. The following abbreviations are used: ITT=Intention to treat, VAS=visual analog scale (linear pain rating of 0-10), PSA=prostate specific antigen, PSADT=PSA doubling time, PCWG2=PC Working Group 2 Guidelines, SD=standard deviation.

**Supplementary table 2.** Characteristics at baseline and at the end of open-label treatment for patients treated in the placebo group during the double blind phase of the trial, grouped according to whether the subject received open label tasquinimod or not.

|                                   |             | Entering open label treatment (N=41) |                  | Not entering open label treatment (N=26) |                  |
|-----------------------------------|-------------|--------------------------------------|------------------|------------------------------------------|------------------|
|                                   |             | Baseline                             | End Double blind | Baseline                                 | End Double blind |
| <b>Age (Years)</b>                | Mean (SD)   | 72.9 (9.3)                           | 73.4 (9.2)       | 73.6 (8.0)                               | 73.8 (8.1)       |
| <b>Pain (VAS)</b>                 | No Pain     | 38 (93%)                             | 27 (66%)         | 21 (81%)                                 | 24 (59%)         |
|                                   | VAS 1-4     | 2 (5%)                               | 14 (34%)         | 5 (19%)                                  | 17 (41%)         |
| <b>Karnofsky Score</b>            | >80%        | 40 (98%)                             | 36 (88%)         | 19 (73%)                                 | 16 (62%)         |
|                                   | <=80%       | 1 (2%)                               | 5 (12%)          | 7 (27%)                                  | 10 (38%)         |
| <b>PSA Level (ug/L)</b>           | Median (SD) | 19 (20)                              | 48 (60)          | 17 (20)                                  | 51 (67)          |
| <b>PSA DT (Mo)</b>                | Median (SD) | 5.4 (3.2)                            | 5.5 (4.6)        | 4.3 (3.0)                                | 2.7 (1.6)        |
| <b>LDH (U/L)</b>                  | Median (SD) | 207 (45)                             | 206 (47)         | 205 (50)                                 | 228 (76)         |
| <b>Alkaline Phosphatase (U/L)</b> | Median (SD) | 88 (39)                              | 94 (47)          | 84 (39)                                  | 122 (74)         |
| <b>Hemoglobin (g/L)</b>           | Median (SD) | 131 (15)                             | 131 (17)         | 133 (12)                                 | 127 (17)         |
| <b>Visceral disease</b>           | N (%)       | 6 (15%)                              | 10 (24%)         | 4 (15%)                                  | 7 (27%)          |
